# Supplementary material for: Distribution and Environmental Drivers of Fungal Denitrifiers in Global Soils
Source: PubMed Central journal article supplement (PMC10269876; doi:10.1128/spectrum.00061-23), 2023-05-24
Supplement: spectrum.00061-23-s0001.pdf [file spectrum.00061-23-s0001.pdf]

## **Supplementary Information**

# **Distribution and environmental drivers of fungal denitrifiers in global soils**

Yvonne Bösch, Grace Pold, Aurélien Saghaï, Magnus Karlsson, Christopher M. Jones, and Sara Hallin

Swedish University of Agricultural Sciences, Department of Forest Mycology and Plant Pathology, Box 7026, 750 07 Uppsala, Sweden

### **Content**

- Supplementary tables 1- 3
- Supplementary figures 1- 4
- Supplementary references

**Table S1 Biome classification, number of metagenomes per biome and references for metagenomes included in the study.** The number (n) of metagenomes per reference is indicated. The total number of metagenomes per biome Level 2 and 3 are shown in parentheses. Unpublished metagenomes are indexed with their NCBI BioProject number (PRJNA). Full references are provided in the supplementary “Reference” section.

| Biome Level 2                                       | Biome Level 3                                  | n                                        | Reference                                                                  |
|-----------------------------------------------------|------------------------------------------------|------------------------------------------|----------------------------------------------------------------------------|
| Croplands (144)                                     | Croplands (144)                                | 41                                       | Bissett et al. 2016 <sup>1</sup>                                           |
|                                                     |                                                | 32                                       | Hartman et al. ISME J 2017 <sup>2</sup>                                    |
|                                                     |                                                | 3                                        | Mendes et al. ISMEJ 2018 <sup>3</sup>                                      |
|                                                     |                                                | 12                                       | Orellana et al. Appl Env Mic 2018 <sup>4</sup>                             |
|                                                     |                                                | 36                                       | PRJNA717057                                                                |
|                                                     |                                                | 20                                       | Xu et al. Nat Com 2020 <sup>5</sup>                                        |
| Deserts (115)                                       | Deserts and Xeric Shrublands (115)             | 3                                        | Bahram et al. Nature 2018 <sup>6</sup>                                     |
|                                                     |                                                | 39                                       | Bissett et al. 2016 <sup>1</sup>                                           |
|                                                     |                                                | 73                                       | NEON, 2021 <sup>7</sup>                                                    |
| Forests (1118)                                      | Boreal Forests & Taiga (89)                    | 7                                        | Bahram et al. Nature 2018 <sup>6</sup>                                     |
|                                                     |                                                | 61                                       | NEON, 2021 <sup>7</sup>                                                    |
|                                                     |                                                | 21                                       | Wilhem et al. Sci Data 2017 <sup>8</sup>                                   |
|                                                     | Mediterranean Forests Woodlands and Scrub (84) | 17                                       | Bahram et al. Nature 2018 <sup>6</sup>                                     |
|                                                     |                                                | 45                                       | Bissett et al. 2016 <sup>1</sup>                                           |
|                                                     |                                                | 22                                       | NEON, 2021 <sup>7</sup>                                                    |
|                                                     |                                                | 66                                       | Bahram et al. Nature 2018 <sup>6</sup>                                     |
|                                                     | Temperate Broadleaf and Mixed Forests (542)    | 139                                      | Bissett et al. 2016 <sup>1</sup>                                           |
|                                                     |                                                | 292                                      | NEON, 2021 <sup>7</sup>                                                    |
|                                                     |                                                | 12                                       | Sorensen et al. Nat Microbiol 2019 <sup>9</sup>                            |
|                                                     |                                                | 21                                       | Wilhem et al. Sci Data 2017 <sup>8</sup>                                   |
|                                                     |                                                | 12                                       | Xiao-Jun Allen Liu; unpublished, PRJNA621569, PRJNA621570, PRJNA654925 –34 |
|                                                     | Temperate Conifer Forests (273)                | 8                                        | Bahram et al. Nature 2018 <sup>6</sup>                                     |
|                                                     |                                                | 60                                       | Diamond et al. Nat Microbiol 2019 <sup>10</sup>                            |
|                                                     |                                                | 161                                      | NEON, 2021 <sup>7</sup>                                                    |
| Tropical and Subtropical Coniferous Forests (3)     | 44                                             | Wilhem et al. Sci Data 2017 <sup>8</sup> |                                                                            |
|                                                     | 3                                              | Bahram et al. Nature 2018 <sup>6</sup>   |                                                                            |
| Tropical and Subtropical Dry Broadleaf Forests (41) | 41                                             | NEON, 2021 <sup>7</sup>                  |                                                                            |
|                                                     | 78                                             | Bahram et al. Nature 2018 <sup>6</sup>   |                                                                            |

|                          |                                                                                |                                                                                                                                                                          |
|--------------------------|--------------------------------------------------------------------------------|--------------------------------------------------------------------------------------------------------------------------------------------------------------------------|
|                          | Tropical and Subtropical Moist Broadleaf Forests (86)                          | 6 Bissett et al. 2016 <sup>1</sup><br>2 Mendes et al. ISMEJ 2017 <sup>3</sup>                                                                                            |
| Grasslands (241)         | Montane Grasslands and Shrublands (5)                                          | 2 Bahram et al. Nature 2018 <sup>6</sup><br>3 Bissett et al. 2016 <sup>1</sup><br>2 Bahram et al. Nature 2018 <sup>6</sup>                                               |
|                          | Temperate Grasslands Savannas and Shrublands (194)                             | 13 Bissett et al. 2016 <sup>1</sup><br>179 NEON, 2021 <sup>7</sup>                                                                                                       |
|                          | Tropical and Subtropical Grasslands Savannas and Shrublands (42)               | 13 Bahram et al. Nature 2018 <sup>6</sup><br>29 Bissett et al. 2016 <sup>1</sup>                                                                                         |
| Tundra (89)              | Tundra (89)                                                                    | 5 Bahram et al. Nature 2018 <sup>6</sup><br>27 NEON, 2021 <sup>7</sup><br>57 Woodcroft et al. Nature 2018 <sup>11</sup>                                                  |
| Rhizosphere (273)        | <i>Amaranthus</i> sp.                                                          | 13 Bandla et al. Scientific Data 2020 <sup>12</sup>                                                                                                                      |
|                          | <i>Arabidopsis thaliana</i>                                                    | 49 Levy et al. 2018 Nature Genetics <sup>13</sup>                                                                                                                        |
|                          | <i>Asparagus</i> sp.                                                           | 12 Crovadore et al. MRA 2017 <sup>14</sup>                                                                                                                               |
|                          | <i>Phaseolus vulgaris</i>                                                      | 23 Mendes et al. ISMEJ 2018 <sup>3</sup>                                                                                                                                 |
|                          | <i>Brassica alboglabra</i>                                                     | 16 Bandla et al. Scientific Data 2020 <sup>12</sup>                                                                                                                      |
|                          | <i>Brassica parachinensis</i>                                                  | 15 Bandla et al. Scientific Data 2020 <sup>12</sup>                                                                                                                      |
|                          | <i>Citrus</i> sp.                                                              | 23 Xu et al. Nature Communications 2018 <sup>15</sup>                                                                                                                    |
|                          | <i>Colobanthus quitensis</i>                                                   | 3 Molina-Montenegro Polar Biology 2019 <sup>16</sup>                                                                                                                     |
|                          | <i>Colobanthus quitensis</i> + <i>Deschampsia antarctica</i>                   | 3 Molina-Montenegro Polar Biology 2019 <sup>16</sup>                                                                                                                     |
|                          | <i>Zea mays</i>                                                                | 32 PRJNA330341-47, PRJNA367156-68, PRJNA405457, PRJNA406023-27, PRJNA444376-80                                                                                           |
|                          | <i>Gossypium</i> sp.                                                           | 1 Singh et al. MRA 2020 <sup>17</sup><br>PRJNA330359-60, PRJNA365493-99, PRJNA366147-53, PRJNA366178-79, PRJNA367152 -53, PRJNA375575-80, PRJNA405458-61, PRJNA444381-85 |
| <i>Miscanthus</i> sp.    | 43                                                                             |                                                                                                                                                                          |
| <i>Populus</i> sp.       | 13 Blair et al. mSystems 2018 <sup>18</sup>                                    |                                                                                                                                                                          |
| <i>Helianthus annuus</i> | 1 Babalola et al Data in Brief 2020 <sup>19</sup>                              |                                                                                                                                                                          |
| <i>Panicum virgatum</i>  | 25 PRJNA330352-58, PRJNA365487-92, PRJNA375569-74, PRJNA405463-67, PRJNA444386 |                                                                                                                                                                          |
| <i>Taxus cuspidata</i>   | 1 Hao et al. J. Basic Microbiology 2018 <sup>20</sup>                          |                                                                                                                                                                          |



**Table S3 Analysis of variances (ANOVA) of fungal *nirK* abundance in biomes at level 2.** The analysis was performed using a generalized linear model approach using a gamma distribution (*fnirK* and *fnirK/pnirK*) with a log link function and a gaussian distribution (*fnirK/18S*) after data transformation (negative log-normal). The F-distribution values for the Biome 2 response variable are indicated with the degrees of freedom in lower case letters.

| <b>Abundance</b>   | <b>Response</b> | <b>Deviance</b> | <b>F-value</b>                | <b>P-value</b>          |
|--------------------|-----------------|-----------------|-------------------------------|-------------------------|
| <i>fnirK</i>       | Biome 2         | 0.20            | F <sub>5, 1479</sub> = 17.74  | <2.2 x10 <sup>-16</sup> |
| <i>fnirK/pnirK</i> | Biome 2         | 16.19           | F <sub>5, 1479</sub> = 129.25 | <2.2 x10 <sup>-16</sup> |
| <i>fnirK/18S</i>   | Biome 2         | 225.92          | F <sub>5, 1479</sub> = 35.26  | <2.2 x10 <sup>-16</sup> |

**a**

| Biome 2     | MG's<br>Total | MG's<br>with <i>fnirK</i> | Zero -<br>Counts (%) |
|-------------|---------------|---------------------------|----------------------|
| Croplands   | 144           | 141                       | 2.1                  |
| Deserts     | 115           | 72                        | 37.4                 |
| Forests     | 1118          | 834                       | 25.4                 |
| Grasslands  | 241           | 156                       | 35.3                 |
| Tundra      | 89            | 64                        | 28.1                 |
| Rhizosphere | 273           | 236                       | 13.6                 |
| Total       | 1980          | 1503                      | 24.1                 |

**b**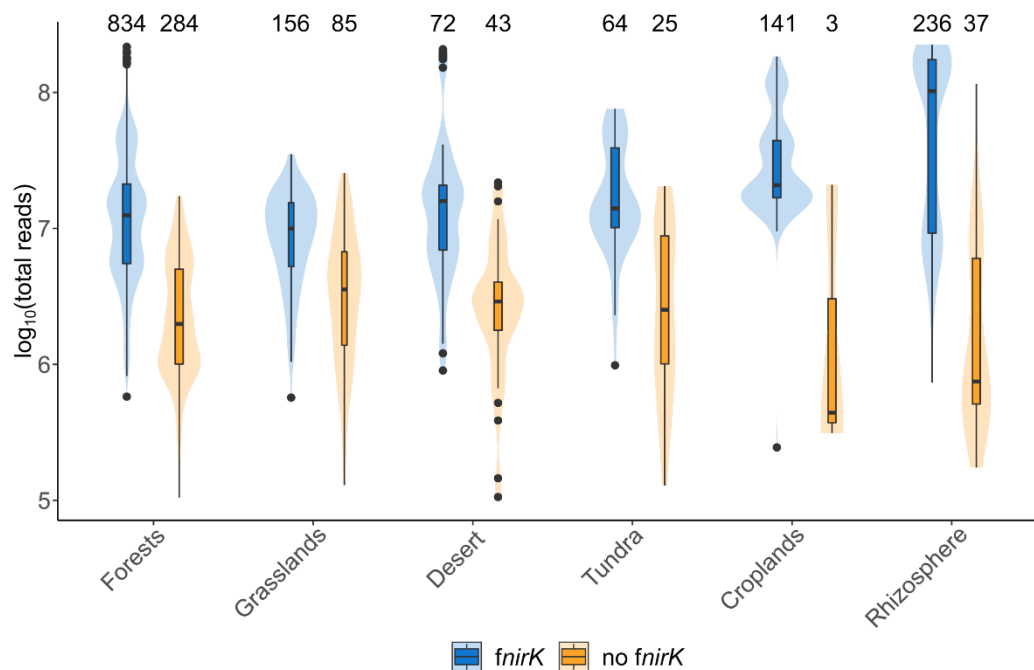

**Figure S1 Distribution of metagenome size and number of metagenomes with zero fungal *nirK* fragment counts across biomes. (a)** Total number of metagenomes (MG's) per biome at Level 2 processed with GraftM and the total number of metagenomes with fungal *nirK* fragment counts included in the subsequent analyses. The fraction (%) of MGs without fungal *nirK* fragments detected is shown as zero-counts. **(b)** The total number of reads per metagenome ( $\log_{10}$  transformed) for each biome at Level 2 are split according to whether fungal *nirK* was detected or not. Box limits represent the inter-quartile range (IQR) with median values represented by the centreline. Whiskers represent values  $\leq 1.5$  times the upper and lower quartiles, while points indicate values outside this range. The shaded areas show kernel density estimations indicating the distribution of the data.

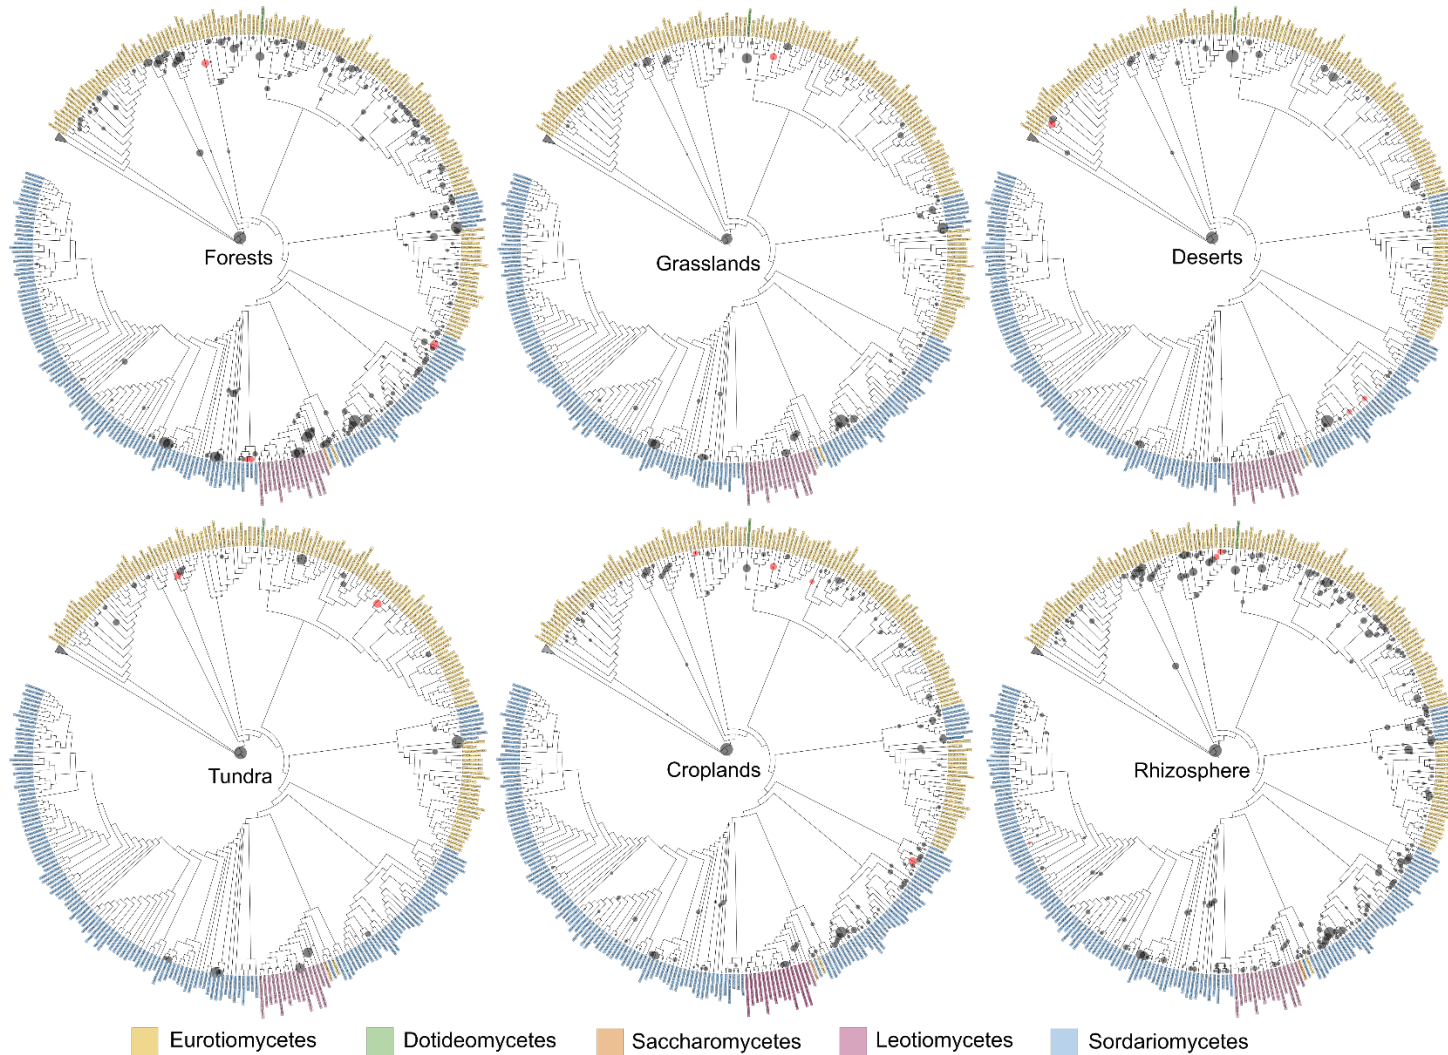

**Figure S2 Phylogenetic placements of fungal *nirK* gene fragments within the *nirK* reference cladogram for each terrestrial biome at classified at Level 2.** Leaf color indicates the fungal class and the outgroup sequences are collapsed. The most likely phylogenetic placement for each read is represented by a circle and the size indicate the number of placements on a given branch. Red circles correspond to biome-aggregated fungal *nirK* placements, i.e. placements nearly exclusively found in one biome or with higher placement aggregations compared to other biomes.

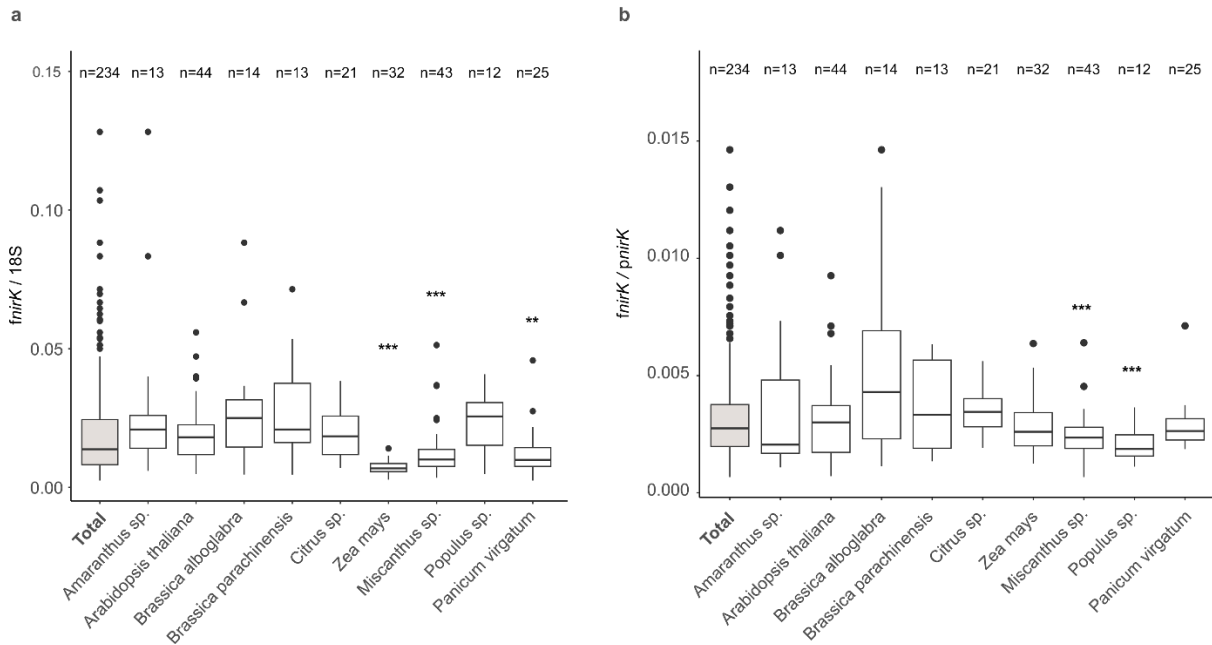

**Figure S3 Comparison of fungal *nirK* counts in host species with  $n > 10$  metagenomes relative to the total of counts in rhizosphere. (a) Counts of fungal *nirK* (*fnirK*) fragments relative to fungal 18S rRNA gene fragments (18S). (b) Counts of fungal *nirK* relative to prokaryotic *nirK* (*pnirK*). Stars represent significant ( $*0.01 < p < 0.05$ ;  $**0.001 < p < 0.01$ ;  $*** p < 0.001$ ) differences of the mean of each host species compared to the total of rhizosphere metagenomes determined by a two-sided t-test. Box limits represent the inter-quartile range (IQR) with median values represented by the centreline. Whiskers represent values  $\leq 1.5$  times the upper and lower quartiles, while points indicate values outside this range.**



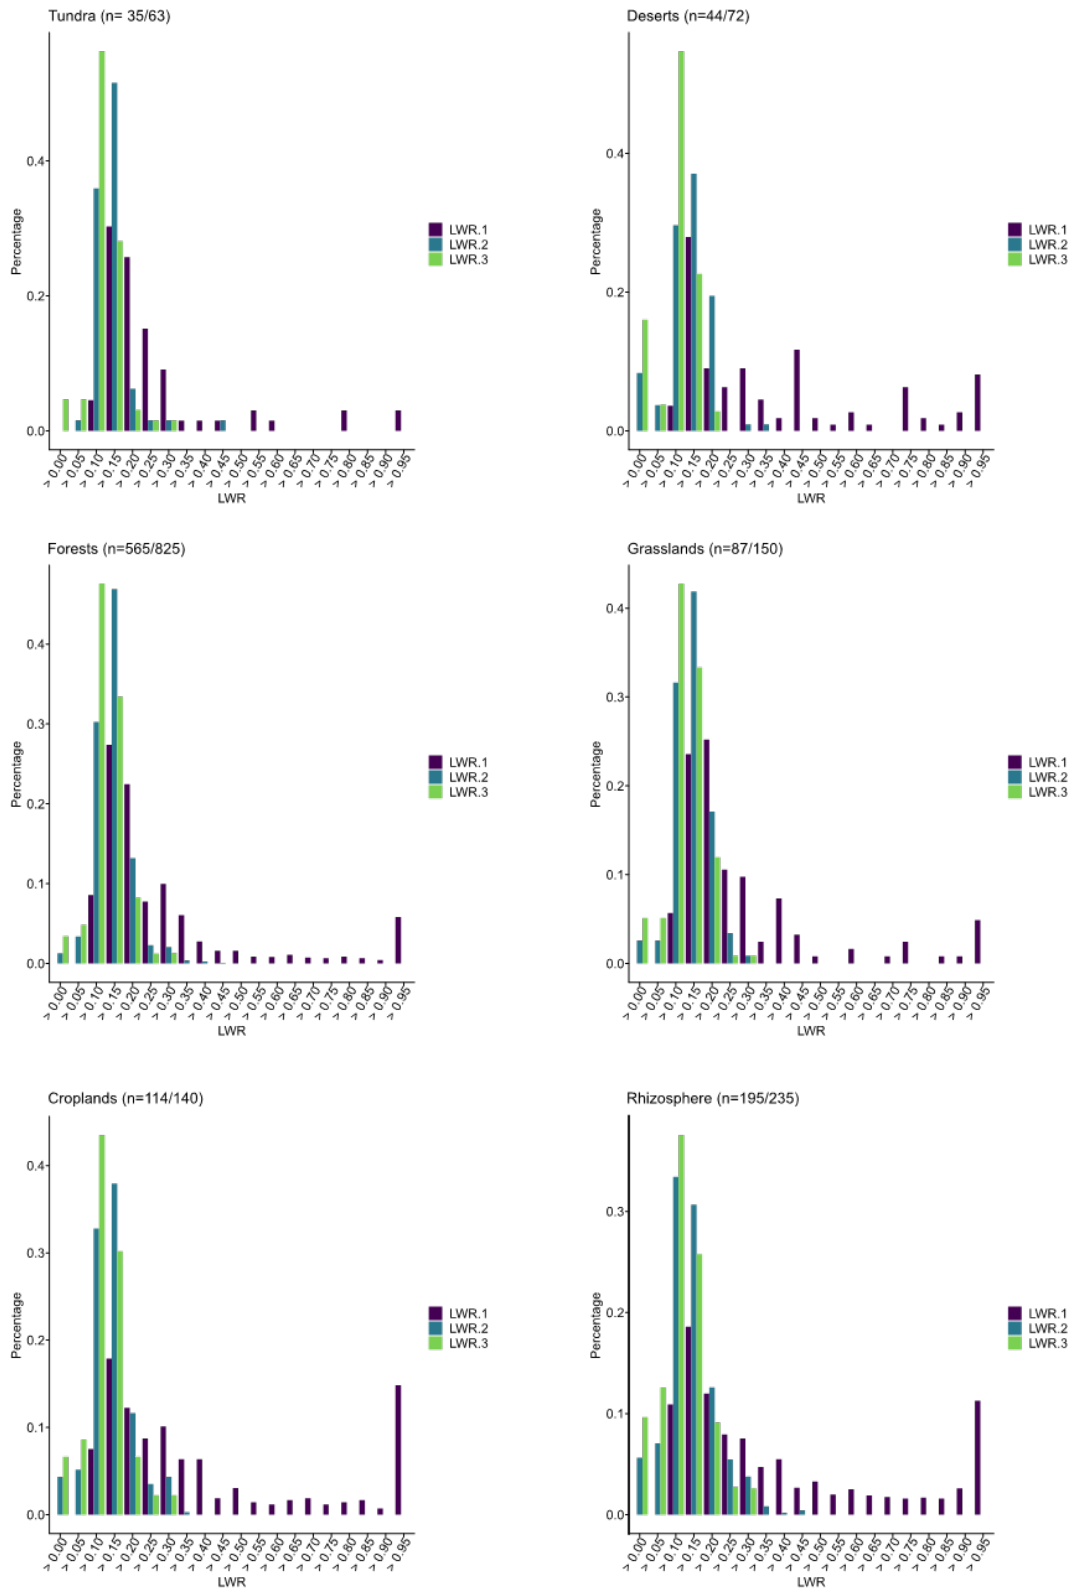

**Figure 4 Histogram of the percentage of first, second and third most likely placements of *nirK* gene fragments from metagenomes at biome Level 2 in the *nirK* reference phylogeny.** The fractions of placements at each level as percentage is shown for different likelihood weight ratios (LWR), i.e. the certainty of a placement in the *nirK* reference phylogeny. The different likelihood levels from most likely (LWR1) followed by the second (LWR2) and third most likely (LWR3) placement are shown next to each other. For analysis of abundance and correlations, only LWR1 placements were considered. Uncertainties of placements are expected due to for example sequencing errors and chimeric sequences, and missing reference sequences in the reference phylogeny, see Czech *et al.* 2022 <sup>21</sup>.

## Supplementary references

1. Bissett, A. *et al.* 2016. Introducing BASE: the biomes of Australian soil environments soil microbial diversity database. *GigaScience* **5**, 21.
2. Hartman, W. H., Ye, R., Horwath, W. R. & Tringe, S. G. 2017. A genomic perspective on stoichiometric regulation of soil carbon cycling. *ISME J.* **11**, 2652–2665.
3. Mendes, L. W., Raaijmakers, J. M., de Hollander, M., Mendes, R. & Tsai, S. M. 2018. Influence of resistance breeding in common bean on rhizosphere microbiome composition and function. *ISME J.* **12**, 212–224.
4. Orellana, L. H., Chee-Sanford, J. C., Sanford, R. A., Löffler, F. E. & Konstantinidis, K. T. 2018. Year-round shotgun metagenomes reveal stable microbial communities in agricultural soils and novel ammonia oxidizers responding to fertilization. *Appl. Environ. Microbiol.* **84**, e01646-17.
5. Xu, H. *et al.* 2020. Soil nitrogen concentration mediates the relationship between leguminous trees and neighbor diversity in tropical forests. *Commun. Biol.* **3**, 1–8.
6. Bahram, M. *et al.* 2018. Structure and function of the global topsoil microbiome. *Nature* **560**, 233–237.
7. National Ecological Observatory Network (NEON). 2021. Soil microbe metagenome sequences (DP1.10107.001). doi:10.48443/FZZJ-G053.
8. Wilhelm, R. C. *et al.* 2017. A metagenomic survey of forest soil microbial communities more than a decade after timber harvesting. *Sci. Data* **4**, 17009.
9. Sorensen, J. W., Dunivin, T. K., Tobin, T. C. & Shade, A. 2019. Ecological selection for small microbial genomes along a temperate-to-thermal soil gradient. *Nat. Microbiol.* **4**, 55–61.
10. Diamond, S. *et al.* 2019. Mediterranean grassland soil C–N compound turnover is dependent on rainfall and depth, and is mediated by genomically divergent microorganisms. *Nat. Microbiol.* **4**, 1356–1367.
11. Woodcroft, B. J. *et al.* 2018. Genome-centric view of carbon processing in thawing permafrost. *Nature* **560**, 49–54.
12. Bandla, A., Pavagadhi, S., Sridhar Sudarshan, A., Poh, M. C. H. & Swarup, S. 2020. 910 metagenome-assembled genomes from the phytobiomes of three urban-farmed leafy Asian greens. *Sci. Data* **7**, 278.
13. Levy, A. *et al.* 2018. Genomic features of bacterial adaptation to plants. *Nat. Genet.* **50**, 138–150.
14. Crovadore, J. *et al.* 2017. Metagenomes of soils samples from an established perennial cropping system of asparagus treated with biostimulants in southern France. *Genome Announc.* **5**, e00511-17.
15. Xu, J. *et al.* 2018. The structure and function of the global citrus rhizosphere microbiome. *Nat. Commun.* **9**, 4894.
16. Molina-Montenegro, M. A. *et al.* 2019. A first insight into the structure and function of rhizosphere microbiota in Antarctic plants using shotgun metagenomic. *Polar Biol.* **42**, 1825–1835.

17. Singh, R. P., Johri, A. K. & Dua, M. 2020. Metagenomic analysis of microbial diversity in cotton rhizosphere soil in Alwar, India. *Microbiol. Resour. Announc.* **9**, e00987-20.
18. Blair, P. M. *et al.* 2018. Exploration of the biosynthetic potential of the populus microbiome. *mSystems* **3**, e00045-18.
19. Babalola, O., Alawiye, T., Lopez, C. R. & Ayangbenro, A. 2020. Shotgun metagenomic sequencing data of sunflower rhizosphere microbial community in South Africa. *Data Brief* **31**, 105831.
20. Hao, J. *et al.* 2021. The effects of soil depth on the structure of microbial communities in agricultural soils in Iowa (United States). *Appl. Environ. Microbiol.* **87**, e02673-20.
21. Czech, L., Stamatakis, A., Dunthorn, M. & Barbera, P. 2022. Metagenomic analysis using phylogenetic placement—a review of the first decade. *Front. Bioinforma.* **2**, 871393.
